# Supplementary material
Source: PubMed Central journal article supplement (PMC8004400)
Supplement: 12902_2021_717_MOESM1_ESM.pdf [file 12902_2021_717_MOESM1_ESM.pdf]

**Additional Table 1** Characteristics at admission, and in-hospital death in patients with COVID-19 belonging to diagnosed or undiagnosed diabetes versus those without diabetes

|                                                 | Non-diabetes<br>(n=153) | Diagnosed diabetes<br>(n=44) | <i>p</i> value <sup>a</sup> | Undiagnosed diabetes<br>(n=36) | <i>p</i> value <sup>b</sup> |
|-------------------------------------------------|-------------------------|------------------------------|-----------------------------|--------------------------------|-----------------------------|
| <b>Demographic and clinical characteristics</b> |                         |                              |                             |                                |                             |
| Age (years)                                     | 64.0 (47.0–69.5)        | 66.0 (60.2–72.0)             | 0.006                       | 65.0 (55.5–71.5)               | 0.287                       |
| Sex                                             |                         |                              |                             |                                |                             |
| Male                                            | 74 (48.4%)              | 23 (52.3%)                   | 0.648                       | 18 (50.0%)                     | 0.860                       |
| Female                                          | 79 (51.6%)              | 21 (47.7%)                   |                             | 18 (50.0%)                     |                             |
| Comorbidities                                   |                         |                              |                             |                                |                             |
| Hypertension                                    | 47 (30.7%)              | 29 (65.9%)                   | < 0.001                     | 14 (38.9%)                     | 0.345                       |
| Coronary artery disease                         | 12 (7.8%)               | 13 (29.5%)                   | < 0.001                     | 1 (2.8%)                       | 0.468                       |
| Cerebrovascular disease                         | 5 (3.3%)                | 5 (11.4%)                    | 0.031                       | 2 (5.6%)                       | 0.620                       |
| Chronic pulmonary disease                       | 12 (7.8%)               | 1 (2.3%)                     | 0.304                       | 7 (19.4%)                      | 0.037                       |
| qSOFA score                                     | 0 (0–1)                 | 0 (0–1)                      | 0.515                       | 1 (0–1)                        | 0.048                       |
| Disease severity classification at admission    |                         |                              | 0.010                       |                                | < 0.001                     |
| Moderate                                        | 89 (58.2%)              | 15 (34.1%)                   |                             | 11 (30.6%)                     |                             |
| Severe                                          | 56 (36.6%)              | 23 (52.3%)                   |                             | 16 (44.4%)                     |                             |
| Critical                                        | 8 (5.2%)                | 6 (13.6%)                    |                             | 9 (25.0%)                      |                             |
| <b>Laboratory findings</b>                      |                         |                              |                             |                                |                             |
| White blood cell count ( $\times 10^9/L$ )      | 5.1 (4.1–6.2)           | 5.8 (4.7–7.1)                | 0.045                       | 7.6 (5.0–10.6)                 | < 0.001                     |
| Lymphocyte count ( $\times 10^9/L$ )            | 1.1 (0.7–1.5)           | 0.85 (0.6–1.2)               | 0.041                       | 0.92 (0.5–1.4)                 | 0.241                       |
| Alanine aminotransferase (U/L)                  | 20 (14–36)              | 22 (16–37)                   | 0.458                       | 25 (15–46)                     | 0.103                       |
| Creatinine ( $\mu\text{mol/L}$ )                | 68 (55–82)              | 75 (61–93)                   | 0.160                       | 79 (60–97)                     | 0.036                       |
| Fasting plasma glucose (mmol/L)                 | 5.5 (5.1–6.1)           | 8.0 (6.5–10.8)               | < 0.001                     | 7.1 (5.9–12.2)                 | < 0.001                     |
| HbA <sub>1c</sub> (%) <sup>c</sup>              | 6.0 (5.7–6.2)           | 7.9 (7.2–8.8)                | < 0.001                     | 6.8 (6.5–8.1)                  | < 0.001                     |
| HbA <sub>1c</sub> (mmol/mol) <sup>c</sup>       | 42 (39–44)              | 63 (55–73)                   | < 0.001                     | 51 (48–65)                     | < 0.001                     |
| Interleukin-6 $\geq 13.26$ pg/mL <sup>d</sup>   | 69/148 (46.6%)          | 25/44 (56.8%)                | 0.235                       | 20/36 (55.6%)                  | 0.336                       |
| D-dimer $\geq 1$ $\mu\text{g/mL}$ <sup>d</sup>  | 63/149 (42.3%)          | 27/44 (61.4%)                | 0.026                       | 24/36 (66.7%)                  | 0.009                       |
| <b>In-hospital death</b>                        | 9 (5.9%)                | 10 (22.7%)                   | 0.001                       | 8 (22.2%)                      | 0.002                       |

Data are expressed as median (interquartile range) or n (%) as appropriate. <sup>a</sup> Diagnosed diabetes vs non-diabetes. <sup>b</sup> Undiagnosed diabetes vs non-diabetes. <sup>c</sup> Analysed in 140 cases having HbA<sub>1c</sub> data. n=70, 34 and 36 in non-diabetes, diagnosed diabetes and undiagnosed diabetes groups, respectively. <sup>d</sup> Median value.

HbA<sub>1c</sub> hemoglobin A<sub>1c</sub>, qSOFA quick sequential organ failure assessment.

**Additional Table 2** Risk factors associated with in-hospital death in patients with COVID-19 by logistic regression analysis

| <b>Variables</b>                                | <b>Univariable OR<br/>(95% CI)</b> | <b><i>p</i> value</b> | <b>Multivariable OR<br/>(95% CI)</b> | <b><i>p</i> value</b> |
|-------------------------------------------------|------------------------------------|-----------------------|--------------------------------------|-----------------------|
| <b>Demographic and clinical characteristics</b> |                                    |                       |                                      |                       |
| Age (years)                                     | 1.08 (1.04–1.12)                   | < 0.001               | 1.07 (1.02–1.12)                     | 0.004                 |
| Sex–male                                        | 2.25 (0.97–5.24)                   | 0.061                 | –                                    | –                     |
| Diabetes                                        | 4.65 (1.98–10.91)                  | < 0.001               | 3.99 (1.48–10.82)                    | 0.006                 |
| Diagnosed                                       | 4.71 (1.78–12.48)                  | 0.002                 | –                                    | –                     |
| Undiagnosed                                     | 4.57 (1.62–12.87)                  | 0.004                 | –                                    | –                     |
| Hypertension                                    | 1.56 (0.70–3.48)                   | 0.283                 | –                                    | –                     |
| Coronary artery disease                         | 1.00 (0.28–3.56)                   | 0.993                 | –                                    | –                     |
| Cerebrovascular disease                         | 2.74 (0.69–10.81)                  | 0.151                 | –                                    | –                     |
| Chronic pulmonary disease                       | 2.89 (1.00–8.73)                   | 0.059                 | –                                    | –                     |
| qSOFA score                                     | 3.52 (1.87–6.62)                   | < 0.001               | 3.35 (1.63–6.87)                     | 0.001                 |
| <b>Laboratory findings at admission</b>         |                                    |                       |                                      |                       |
| White blood cell count ( $\times 10^9/L$ )      | 1.29 (1.17–1.44)                   | < 0.001               | –                                    | –                     |
| Lymphocyte count ( $\times 10^9/L$ )            | 0.24 (0.09–0.68)                   | 0.007                 | –                                    | 0.399                 |
| Alanine aminotransferase (U/L)                  | 1.00 (0.99–1.01)                   | 0.757                 | –                                    | –                     |
| Creatinine ( $\mu\text{mol/L}$ )                | 1.00 (1.00–1.01)                   | 0.244                 | –                                    | –                     |
| Fasting plasma glucose (mmol/L)                 | 1.21 (1.10–1.33)                   | < 0.001               | –                                    | –                     |
| HbA <sub>1c</sub> (%)                           | 1.14 (0.83–1.57)                   | 0.412                 | –                                    | –                     |
| Interleukin-6 $\geq 13.26$ pg/mL <sup>a</sup>   | 1.09 (0.48–2.51)                   | 0.832                 | –                                    | –                     |
| D-dimer $\geq 1$ $\mu\text{g/mL}$ <sup>a</sup>  | 7.01 (2.34–21.02)                  | 0.001                 | 3.42 (1.01–11.58)                    | 0.048                 |

<sup>a</sup>Median value.

*HbA<sub>1c</sub>* hemoglobin A1c, *OR* odds ratio, *qSOFA* quick sequential organ failure assessment.

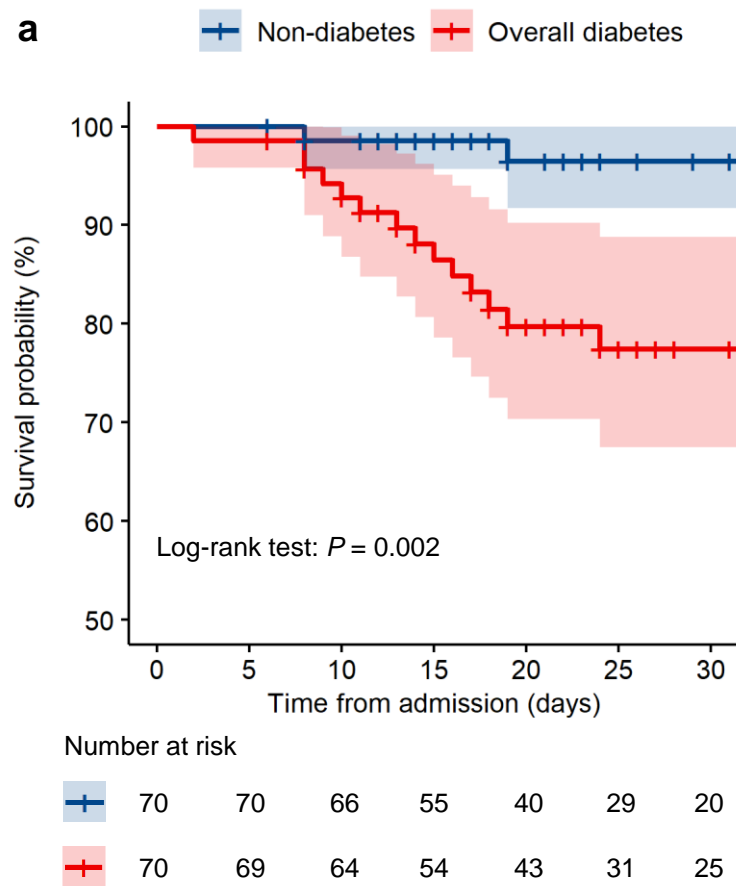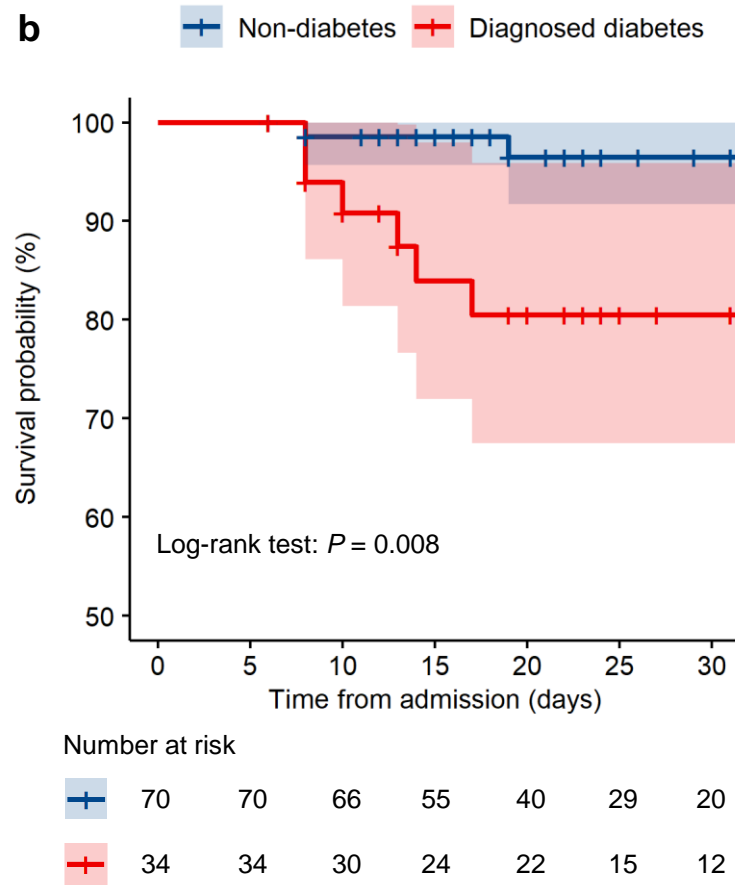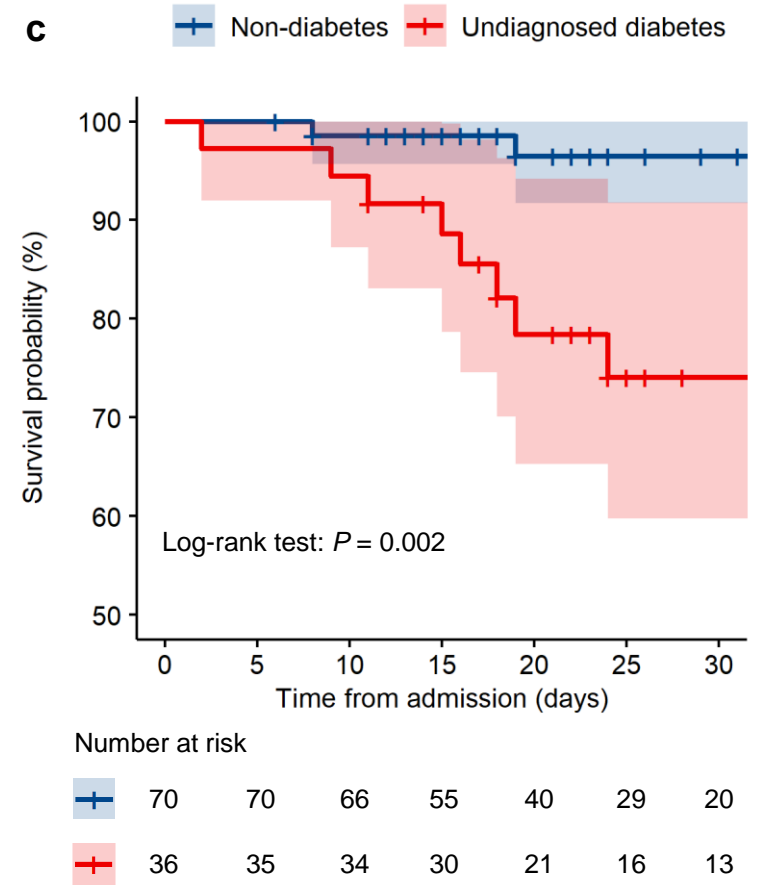

**Additional Fig. 1** Survival probability of inpatients with COVID-19 who underwent HbA1c testing. Kaplan-Meier survival curves of patients with COVID-19 belonging to the overall diabetes (a), diagnosed diabetes (b), and undiagnosed diabetes (c) groups versus that of patients without diabetes in a subgroup of participants who had their HbA1c tested at admission. The blue and pink areas represent 95% CIs. *HbA1c* hemoglobin A1c.
